# Supplementary material for: Epigallocatechin-3-Gallate Protects Pro-Acinar Epithelia Against Salivary Gland Radiation Injury
Source: MDPI journal article supplement (doi:10.3390/ijms22063162), 2021-03-19
Supplement: s1 [file s1]

# Supplementary Data: Figures and Tables

Sulistiyani et al. IJMS Mar 2021

Revised 17 March 2021

**Table S1. List of primary and secondary antibodies were used.**

Manufacturers: Life Technologies and Invitrogen are subsidiaries of Thermo Fisher Scientific (USA), Santa Cruz (USA), Abcam (UK), Cell Signaling Technologies (USA), and R&D systems (USA).

|                                 | <b>Antibody</b>      | <b>Dilution</b> | <b>Manufacturer /<br/>Catalog number</b> |
|---------------------------------|----------------------|-----------------|------------------------------------------|
| <b>Secondary<br/>Antibodies</b> | Alexa Fluor 488      | 1:200           | Life Technologies / A21200               |
|                                 | Alexa Fluor 594      | 1:200           | Life Technologies / A21442               |
|                                 | Alexa Fluor 594      | 1:200           | Life Technologies / A21442               |
|                                 | Alexa Fluor 488      | 1:200           | Life Technologies / A11055               |
| <b>Primary<br/>Antibodies</b>   | Sox2                 | 1:100           | Santa Cruz / SC17320                     |
|                                 | Ki67                 | 1:200           | Invitrogen / PA5-19462                   |
|                                 | KRT14                | 1:500           | Abcam / 181595                           |
|                                 | AQP5                 | 1:100           | Abcam / AB92320                          |
|                                 | Cleaved<br>Caspase 3 | 1:200           | Cell Signaling Technologies /<br>9664S   |
|                                 | β-3 tubulin (Tuj-1)  | 1:100           | R&D systems / MAB1195                    |

Table S2. List of oligonucleotide primer sequences

| Gene          | Forward sequence             | Reverse sequence         |
|---------------|------------------------------|--------------------------|
| <i>Ki67</i>   | CATACCTGAGCCCATCACCA         | GCTTTGCTGCATTCCGAGTA     |
| <i>Sox 2</i>  | CAGCATGTCCTACTCGCAGCAG       | TGGAGTGGGAGGAAGAGGTAACC  |
| <i>Sox10</i>  | ATCAGCCACGAGGTAATGTCCAAC     | ACTGCCCAGCCCGTAGCC       |
| <i>Krt14</i>  | CAGCCCCTACTTCAAGACCA         | GTCGATCTGCAGGAGGACAT     |
| <i>Aqp5</i>   | TCTACTTCTACTTGCTTTTCCCCTCCTC | CGATGGTCTTCTTCCGCTCCTCTC |
| <i>Krt5</i>   | TCCTGTTGAACGCCGCTGAC         | CGGAAGGACACACTGGACTGG    |
| <i>Acta2</i>  | GGAGAAGCCCAGCCAGTCGC         | AGCCGGCCTTACAGAGCCCA     |
| <i>Krt19</i>  | CCTCCCGAGATTACAACCACT        | GGCGAGCATTGTCAATCTGT     |
| <i>Mist1</i>  | GCTGACCGCCACCATACTTAC        | TGTGTAGAGTAGCGTTGCAGG    |
| <i>Nkcc1</i>  | TTCCGCGTGAAGTTCGTGG          | TTGGTGTGGGTGTCATAGTAGT   |
| <i>Pecam1</i> | TCCAACAGAGCCAGCAGTATGAGG     | TCCAATGACAACCACCGCAATGAG |
| <i>Tubb3</i>  | CCAGAGCCATCTAGCTACTGACACTG   | AGAGCCAAGTGGACTCACATGGAG |
| <i>Rsp29</i>  | GGAGTCACCCACGGAAGTTCGG       | GGAAGCACTGGCGGCACATG     |

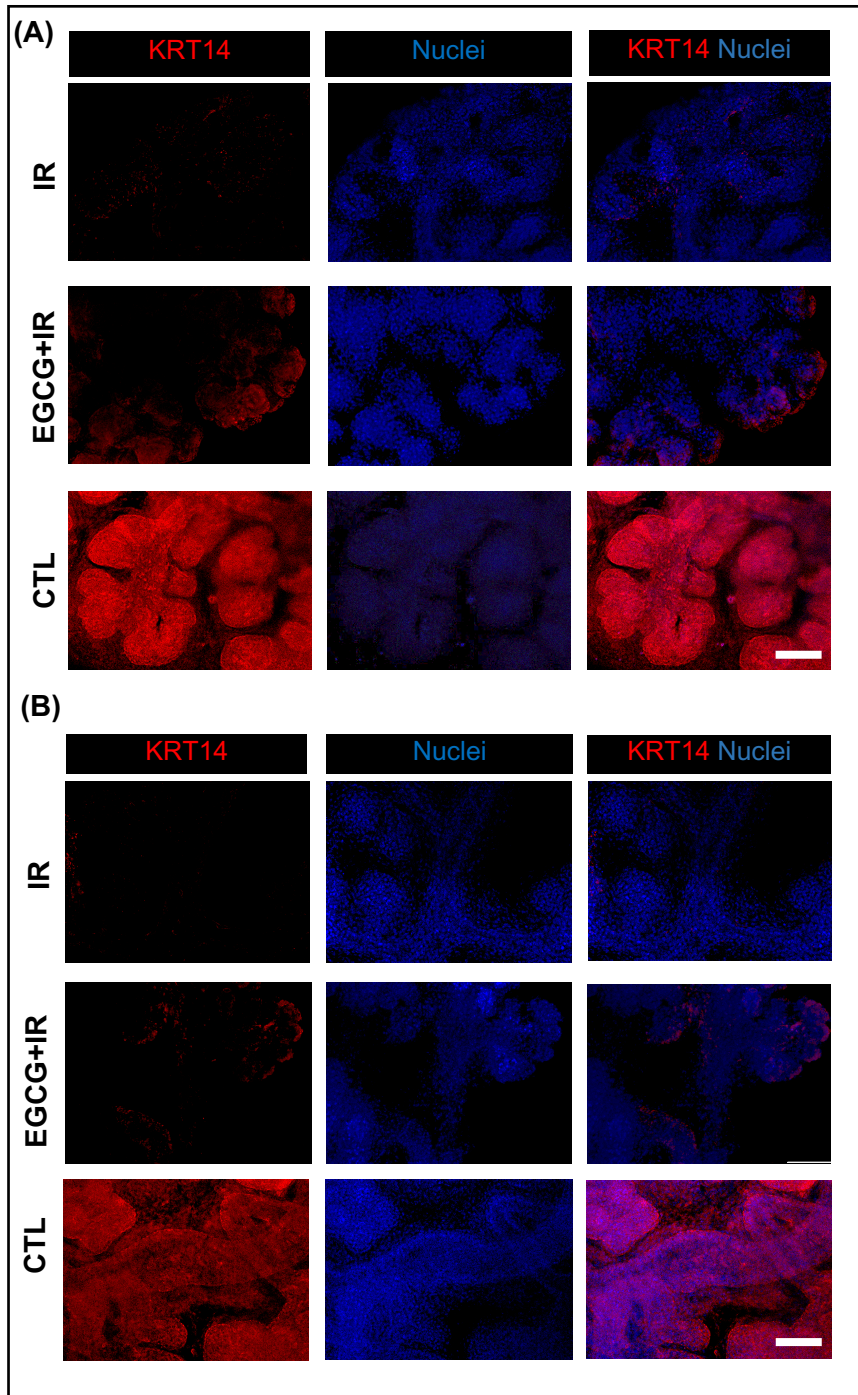

**Figure S1. Expression of epithelial progenitors in EGCG-treated glands after IR injury.** Expression of cytokeratin 14 (KRT14) progenitor markers in pro-acinar endbud compartments (A) and in ductal compartments (B) after immunofluorescence staining. Images shown are maximum intensity projections. Mag.: 20X. Scale bar: 100μm.



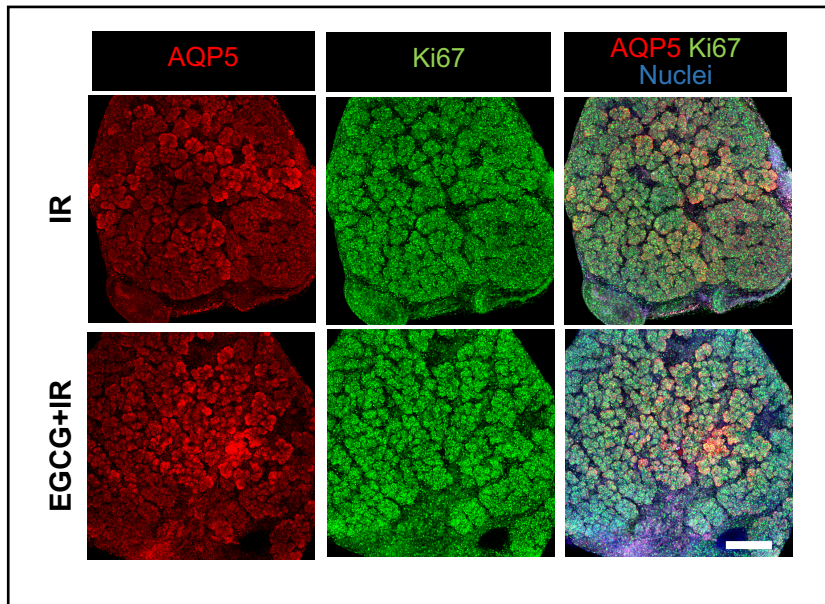

**Figure S2.** Expression of differentiated acinar epithelial and mitotic markers in EGCG pre-treated glands after IR injury. SG were immuno-stained with Aquaporin 5 (AQP5), a mitotic marker (Ki67) and incubated with a nuclear stain. Mag.: 10X. Scale bar: 200 $\mu$ m.

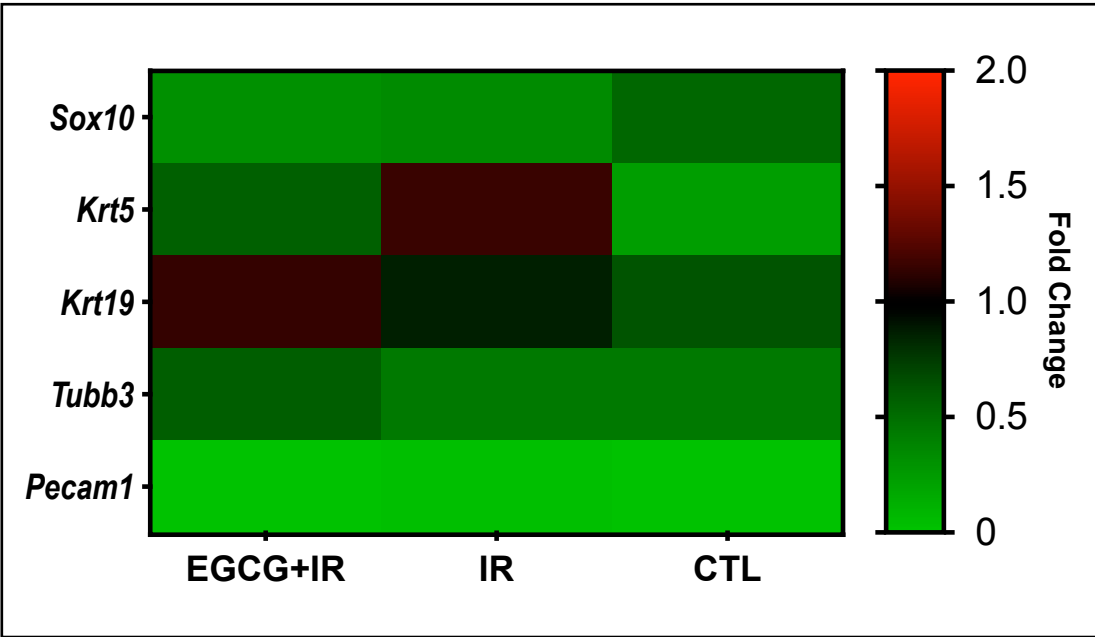

**Figure S3.** Heatmap with mean expression of other stem/progenitor, ductal epithelial, neuronal and vascular markers in the whole gland by qPCR. Data are presented as mean ( $n = 3$ ) of fold change relative to house keeping gene normalized to baseline from  $n = 3$ . Welch's Student *t*-test were performed between untreated and treated but not significant difference was observed. CTL represent non-irradiated untreated controls.

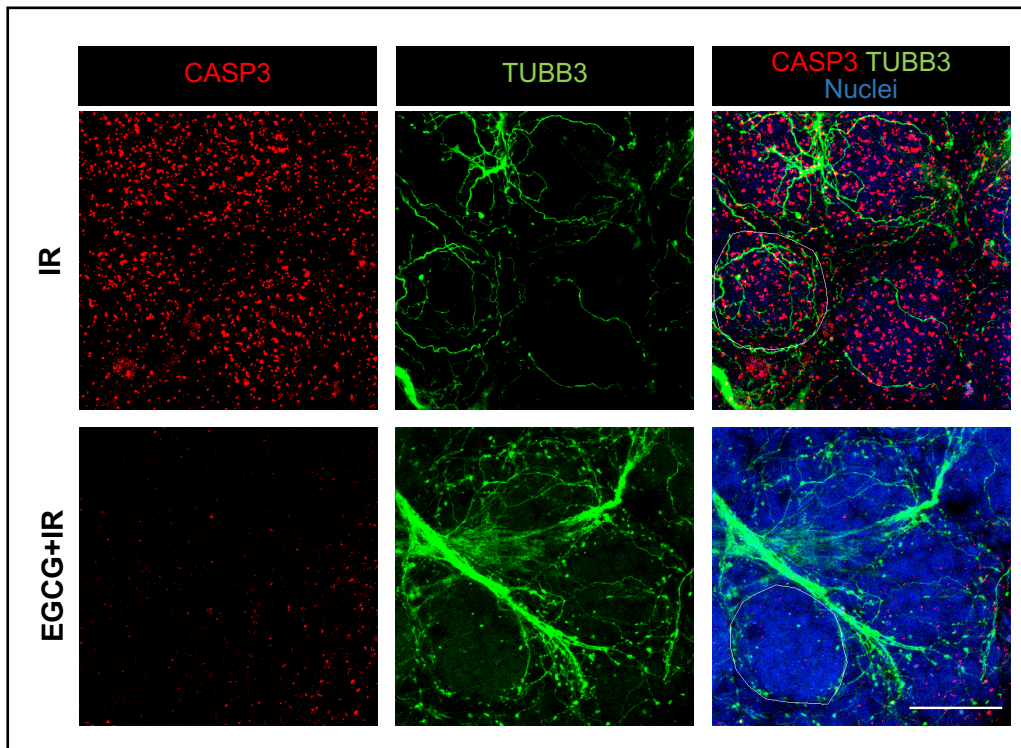

**Figure S4.** Expression of pro-apoptotic Caspase 3 marker in EGCG pre-treated glands after IR injury. SG were immuno-stained with cleaved-caspase 3 (CASP3),  $\beta$ -3 tubulin (TUBB3) to depict the boundaries of acinar buds where terminal neurons synapse. SG were also incubated with a nuclear stain. Mag.: 40X. Scale bar: 100 $\mu$ m.
